# Supplementary material for: Characterizing Autophagy in the Cold Ischemic Injury of Small Bowel Grafts: Evidence from Rat Jejunum
Source: MDPI journal article supplement (doi:10.3390/metabo11060396), 2021-06-17
Supplement: s1 [file s1]

## Characterizing Autophagy in the Cold Ischemic Injury of Small Bowel Grafts: Evidence from Rat Jejunum.

Ibitamuno Caleb<sup>1\*</sup>, Luca Erlitz<sup>1</sup>, Vivien Telek<sup>1</sup>, Mónika Vecsernyés<sup>2</sup>, György Sétáló Jr.<sup>2</sup>, Péter Hardi<sup>1</sup>, Ildikó Takács<sup>1</sup>, Gábor Jancsó<sup>1</sup>, Tibor Nagy<sup>1</sup>.

1. Institute of Surgical Research and Techniques, University of Pécs Medical School, Pécs, Hungary. Email: caleb.ibitamuno@pte.hu

2. Institute of Medical Biology and Central Electron Microscope Laboratory, University of Pécs Medical School, Pécs, Hungary.

\*Correspondence: ibical@yahoo.com

### Supplementary Materials

#### S. 1: Transmission Electron Microscope photographs.

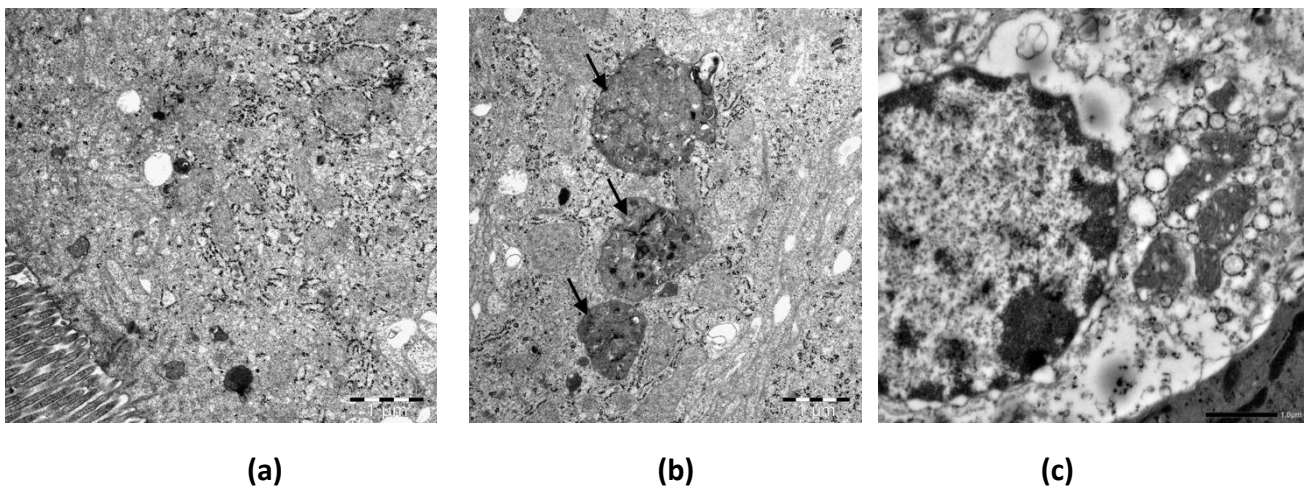

S. 1 – Representative TEM images from the cytoplasm of intestinal villi epithelial cells. Scale bar: 1.0μm. Panels a represents the 0hr group; Panel b represents the 6hr and Panels c represents 12hr group. In the 6hr group, the presence of autophagosomes (membrane bound structure containing cytoplasmic structures: black arrows) are clearly visible.

**S. 2: Changes in autophagy after pharmacological manipulation using rapamycin and 3-methyladenine.**

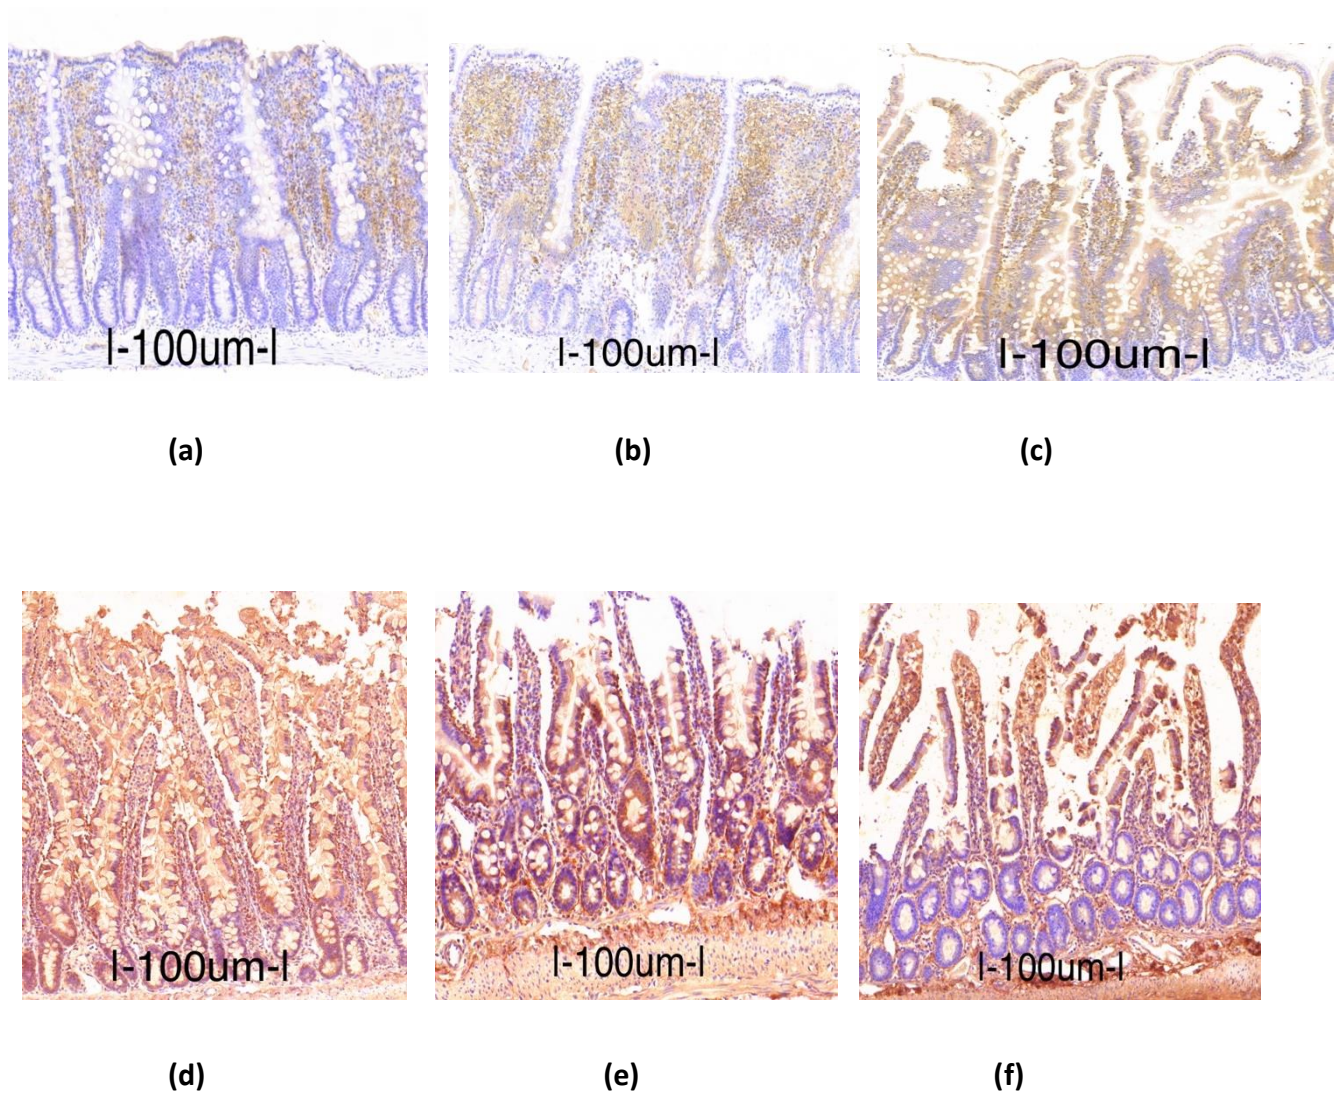

S. 2.1 – Immunostaining for p62 and Beclin-1. Panel a-c represent changes in the immunostaining for p62 protein after 6 hours of preservation. Panel a represents the Rapa group; Panel b represents the PC group; Panel c represents the 3-MA group. Panel d-f represent changes in immunostaining for Beclin-1 at the end of preservation (12 hours). Panel d represents the Rapa group; Panel e represents the PC group; Panel f represents the 3-MA group. Both proteins stain the cytoplasm of the intestinal epithelial cells brown. Scale bar: 100um.

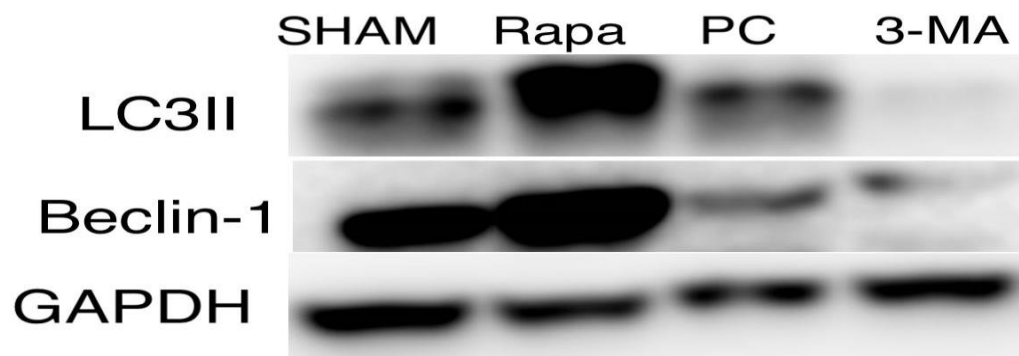

(a)

S2.2 – Panel a show the changes in electrophoresis pattern for LC3II and Beclin-1 at the end of the preservation period.

### S. 3: Influence of autophagy on apoptosis

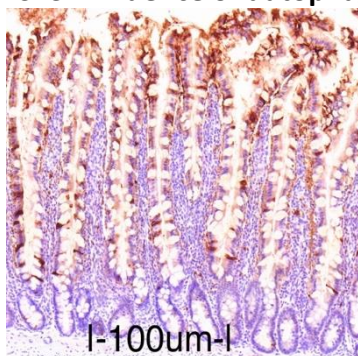

(a)

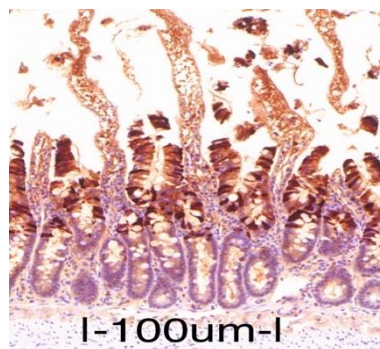

(b)

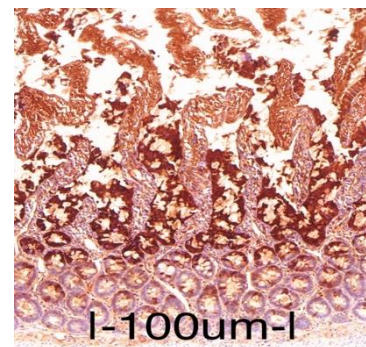

(c)

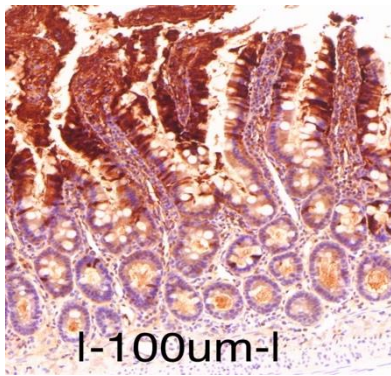

(d)

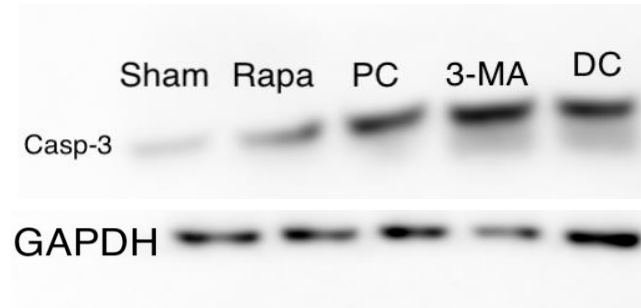

(e)

S. 3 – Effect of autophagy on apoptosis after 12 hours of preservation. Panel a-d are picture representation of immunostaining for active caspase-3. Dark brown staining of the cytoplasm is considered a positive stain. The Rapa group is represented in Panel a showing few positive stains. Panel b represents the PC group, showing more positive cells than the Rapa group. 3-MA group is represented by Panel C, here there is a strong positivity for caspase-3. The DC group (Panel D) also shows positive cytoplasmic stain. When compared the Rapa group has the least positivity among the groups. Panel e shows the representative electrophoresis pattern for the cleaved caspase-3.

#### S. 4: Influence of autophagy on preservation injury



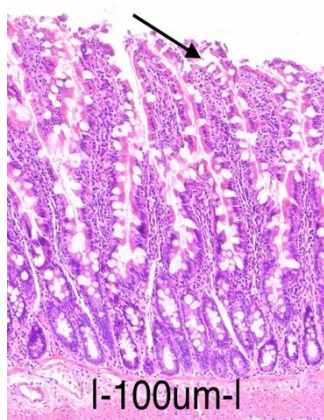

(a)

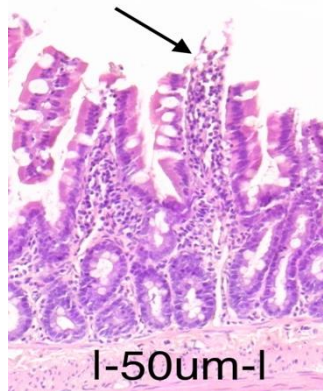

(b)

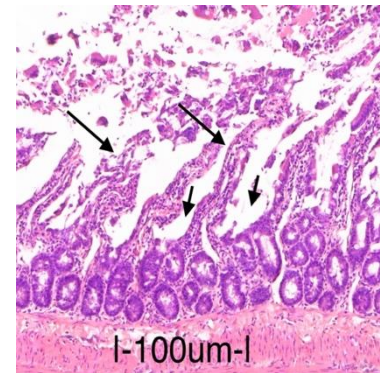

(c)

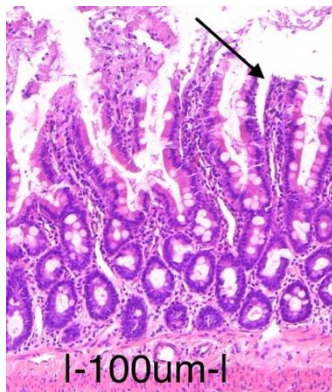

(d)

S. 4.1 – effect of autophagy on the intestinal mucosa. Panel a-d represent pictures from HE staining of the small bowel graft after 12 hours of preservation. Panel a is from the Rapa group, the arrow points to extended epithelial space at the tip of the villus (Park/Chiu score 2) which was characteristic for mucosa of this group. Panel b is from the PC group, arrow points to the characteristic incomplete denudation of villi with some loss of villous tissue (Park/Chiu score 4-5). Panel c is from the 3-MA group which shows complete villous denudation (long arrow) and some loss of villous tissue (short arrow) (Park/Chiu =5). Panel d is from the DC group, the epithelium also shows regions of villous tissue loss and incomplete denudation (arrow) (Park/Chiu score 4-5).

| Groups           | Sham       | Rapa          | PC           | 3-MA           | DC             |
|------------------|------------|---------------|--------------|----------------|----------------|
| LDH (IU/L)       | 25.61±1.49 | 425.61±11.79# | 593.30±22.68 | 685.40±40.32 # | 558.00±20.16 ^ |
| Lactate (mmol/l) | 0.06±0.01  | 1.06±0.11#    | 1.55±0.06    | 1.83±0.04#     | 1.53±0.14^.    |

S. 4.2 – Table showing changes in Ldh and lactate levels at the end of the 12-hour long cold storage. Data are mean  $\pm$  SEM. #P < 0.05 versus PC. ^P < 0.05 DC versus Rapa group.

#### S.5: Reperfusion Injury

| Groups             | Sham               | Rapa                 | PC                 | 3-MA                |
|--------------------|--------------------|----------------------|--------------------|---------------------|
| Park/Chiu scores   | 0.94 $\pm$ 2.75    | 2.86 $\pm$ 0.11#     | 5.04 $\pm$ 0.11    | 5.76 $\pm$ 0.12     |
| LDH (IU/L) - 1 min | 72.71 $\pm$ 9.66   | 103.680 $\pm$ 6.01#  | 145.20 $\pm$ 10.38 | 183.30 $\pm$ 12.64# |
| LDH (IU/L) - 60min | 210.80 $\pm$ 16.45 | 332.47 $\pm$ 198.17# | 433.23 $\pm$ 20.46 | 530.20 $\pm$ 16.53# |

S.5 – Table showing changes in Park/Chiu scores and Ldh levels corresponding to the reperfusion injury. Data are mean  $\pm$  SEM. #P < 0.05 versus PC. group.
